# Supplementary material
Source: PubMed Central journal article supplement (PMC2885952)
Supplement: NIHMS203406-supplement-Supp1.pdf [file NIHMS203406-supplement-Supp1.pdf]

## **SUPPLEMENTAL MATERIAL**

### **Supplemental Methods**

#### **MEDLINE Search Query.**

(meat[tw] OR meats[tiab] OR "meat products"[tw] OR "meat products"[tiab] **OR** beef[tiab] OR veal[tiab] OR goat[tiab] OR lamb[tiab] OR pork[tiab] OR sausage[tiab] OR sausages[tiab] OR ham[tiab] OR hams[tiab] OR pastrami[tiab] OR bacon[tiab] OR bacons[tiab] OR salami[tiab] OR salamis[tiab] OR "meat protein"[tiab] OR "meat proteins"[tiab] OR "luncheon meat"[tiab] OR "luncheon meats"[tiab] OR "deli meat"[tiab] OR "deli meats"[tiab] OR "animal food"[tiab] OR "animal foods"[tiab]) **AND** (("Diabetes Mellitus"[Mesh] OR diabetes[tiab]) **OR** ("cardiovascular diseases"[Mesh] OR "cardiovascular disease"[tiab] OR "cardiovascular diseases"[tiab] OR "heart disease"[tiab] OR "heart diseases"[tiab] OR "myocardial infarction"[tiab] OR "myocardial infarctions"[tiab] OR "heart attack"[tiab] OR "heart attacks"[tiab] OR "sudden death"[tiab] OR "sudden deaths"[tiab] OR stroke[tiab] OR strokes[tiab] OR "cerebrovascular accident"[tiab] OR "cerebrovascular accidents"[tiab]))

## List of the 75 Excluded Full-Text Manuscripts and Reasons for Exclusion.

| Reference                                  | Reason for Exclusion                                     |
|--------------------------------------------|----------------------------------------------------------|
| 1. KeyTJ <i>et al.</i> 1999(36)            | Review                                                   |
| 2. Murakami K <i>et al.</i> 2005(48)       | Review                                                   |
| 3. Key TJ <i>et al.</i> 1998(35)           | Review                                                   |
| 4. Fraser GE 1988(14)                      | Review                                                   |
| 5. Harper AE 1983(23)                      | Review                                                   |
| 6. Wahrburg U <i>et al.</i> 2002(74)       | Review                                                   |
| 7. Willett W 2003(75)                      | Review                                                   |
| 8. Stoeckli R, Keller U 2004(67)           | Review                                                   |
| 9. Biesalski HK 2005(2)                    | Review                                                   |
| 10. Li D 2005(39)                          | Review                                                   |
| 11. Adams SM, Standridge JB 2006(1)        | Review                                                   |
| 12. Muntoni S, Muntoni S 2006(47)          | Review                                                   |
| 13. Hodgson JM <i>et al.</i> 2007(28)      | Review                                                   |
| 14. Tappel A 2007(69)                      | Review                                                   |
| 15. Truswell AS 2007(71)                   | Review                                                   |
| 16. Dobbins MJ <i>et al.</i> 2007(10)      | Review                                                   |
| 17. Bilenko N <i>et al.</i> 2005(3)        | Cross-sectional study                                    |
| 18. Shimakawa T <i>et al.</i> 1993(61)     | Cross-sectional study                                    |
| 19. Jafar TH 2006(32)                      | Cross-sectional study                                    |
| 20. Panagiotakos DB <i>et al.</i> 2007(52) | Cross-sectional study                                    |
| 21. Qidwai W <i>et al.</i> 2005(55)        | Cross-sectional study                                    |
| 22. Yan S 1989(76)                         | Cross-sectional study                                    |
| 23. Pfister R <i>et al.</i> 2004(53)       | Cross-sectional study                                    |
| 24. Menotti A <i>et al.</i> 1999(44)       | Ecological study                                         |
| 25. Takeya Y <i>et al.</i> 1984(68)        | Ecological study                                         |
| 26. Fraser AG <i>et al.</i> 1992(13)       | Duplicate publication                                    |
| 27. Schulze MB <i>et al.</i> 2007(59)      | Duplicate publication                                    |
| 28. Hu FB <i>et al.</i> 1999(30)           | Duplicate publication                                    |
| 29. van Dam RM <i>et al.</i> 2002(72)      | Duplicate publication                                    |
| 30. Gramenzi A <i>et al.</i> 1990(21)      | Duplicate publication                                    |
| 31. Lee DH <i>et al.</i> 2004(38)          | Duplicate publication                                    |
| 32. Chang-Claude J <i>et al.</i> 2005(8)   | Vegetarians vs. non vegetarians                          |
| 33. Thorogood M <i>et al.</i> 1994(70)     | Vegetarians vs. non vegetarians                          |
| 34. Mann JI <i>et al.</i> 1997(41)         | Vegetarians vs. non vegetarians                          |
| 35. Vang A <i>et al.</i> 2008(73)          | Vegetarians vs. non vegetarians (Adventist Health Study) |
| 36. Fraser GE 1999(15)                     | Vegetarians vs. non vegetarians (Adventist Health Study) |
| 37. Fraser GE <i>et al.</i> 1992(16)       | Vegetarians vs. non vegetarians (Adventist Health Study) |
| 38. Fraser GE <i>et al.</i> 1997(17)       | Vegetarians vs. non vegetarians (Adventist Health Study) |
| 39. Fraser GE <i>et al.</i> 1997(18)       | Vegetarians vs. non vegetarians (Adventist Health Study) |
| 40. Snowdon DA 1988(63)                    | Vegetarians vs. non vegetarians (Adventist Health Study) |

|                                              |                                                          |
|----------------------------------------------|----------------------------------------------------------|
| 41. Snowdon DA 1984(64)                      | Vegetarians vs. non vegetarians (Adventist Health Study) |
| 42. Brunner EJ <i>et al.</i> 2008(4)         | Dietary patterns                                         |
| 43. Drogan D <i>et al.</i> 2007(11)          | Dietary patterns                                         |
| 44. Fung TT <i>et al.</i> 2001(20)           | Dietary patterns                                         |
| 45. Harriss LR <i>et al.</i> 2007(24)        | Dietary patterns                                         |
| 46. Heidemann C <i>et al.</i> 2008(26)       | Dietary patterns                                         |
| 47. Hu FB <i>et al.</i> 2000(29)             | Dietary patterns                                         |
| 48. Hu G <i>et al.</i> 2006(31)              | Dietary patterns                                         |
| 49. Kant AK <i>et al.</i> 1995(34)           | Dietary patterns                                         |
| 50. Martinez-Ortiz JA <i>et al.</i> 2006(42) | Dietary patterns                                         |
| 51. Fung TT <i>et al.</i> 2008(19)           | Dietary patterns                                         |
| 52. Mitrou PN <i>et al.</i> 2007(45)         | Dietary patterns                                         |
| 53. McNaughton SA <i>et al.</i> 2008(43)     | Dietary patterns                                         |
| 54. Hodge AM <i>et al.</i> 2007(27)          | Dietary patterns                                         |
| 55. Heidemann C <i>et al.</i> 2005(25)       | Dietary patterns                                         |
| 56. Osler M <i>et al.</i> 2001(50)           | Dietary patterns                                         |
| 57. Schulze MB <i>et al.</i> 2005(60)        | Dietary patterns                                         |
| 58. Osler M <i>et al.</i> 2002(49)           | Dietary patterns                                         |
| 59. Panagiotakos D <i>et al.</i> 2007(51)    | Dietary patterns                                         |
| 60. Montonen J <i>et al.</i> 2005(46)        | Dietary patterns                                         |
| 61. Jiang R <i>et al.</i> 2004(33)           | Iron intake                                              |
| 62. Malaviarachchi D <i>et al.</i> 2002(40)  | Iron intake                                              |
| 63. Sauvaget C <i>et al.</i> 2002(58)        | Animal protein/fat                                       |
| 64. Steffen LM <i>et al.</i> 2007(66)        | Disease outcome other than incident CVD or diabetes      |
| 65. Damiao R <i>et al.</i> 2006(9)           | Disease outcome other than incident CVD or diabetes      |
| 66. Burke V <i>et al.</i> 2007(5)            | Disease outcome other than incident CVD or diabetes      |
| 67. Qi L <i>et al.</i> 2007(54)              | Participants with prevalent disease                      |
| 68. Qiu D <i>et al.</i> 2003(56)             | Not meeting meat definition                              |
| 69. Cai H <i>et al.</i> 2007(6)              | Not meeting meat definition                              |
| 70. Kinjo Y <i>et al.</i> 1999(37)           | Not meeting meat definition                              |
| 71. Zyriax BC <i>et al.</i> 2005(77)         | Not meeting meat definition                              |
| 72. Spencer CA <i>et al.</i> 1999(65)        | Not meeting meat definition                              |
| 73. Duc Son le NT <i>et al.</i> 2005(12)     | Not meeting meat definition                              |
| 74. Reunanen A <i>et al.</i> 1995(57)        | Not meeting meat definition                              |
| 75. Simmons RK <i>et al.</i> 2007(62)        | Prediction score, not adjusted                           |

---

## **Nutritional Qualities of Red and Processed Meats**

To estimate average nutritional qualities of red and processed meats, we analyzed data from two 24-hr diet recalls in the 2005-06 US National Health and Nutrition Examination Survey (NHANES), accounting for NHANES sampling and weighting strategies(7). Foods consumed in this US survey were grouped to match our meta-analysis' definitions for red and processed meat. For red meats the specific codes used in the NHANES were: 210-215 for beef; 220- 222, 224 and 227 for pork; and 230-234 for lamb, veal, and game. For processed meats the specific codes used in the NHANES were: 216 for processed beef; 223 for ham; 225-226 for bacon; and 252 for frankfurters, sausages, lunchmeats, and meat spreads. Preservative contents were obtained from a recent report of published nitrate, nitrite, and nitrosamine contents of foods commonly consumed in the US(22). Preservative contents of subtypes of red and processed meats from this report were applied directly to the subtypes of red and processed meats in the NHANES database, after standardization to the same serving size. The individual subtypes of red and processed meats were first summed, and then averaged across the two days and across all individuals applying the NHANES sampling weights(7) (the survey design was declared in STATA as: svyset [pw=wtdr2d], strata(sdmvstra) psu(sdmvpsu)) to derive the overall average national weighted red and processed meat consumption. Subsequently, average nutrient and preservative contents were estimated for a 50 g serving of red meat and a 50 g serving of processed meat. Analyses were performed using STATA 10.0 (College Station, TX), with two-tailed  $\alpha < 0.05$ .

## Supplemental Figure

Funnel plots for graphical evaluation of potential publication bias. P values based on the Begg adjusted rank-correlation test for presence of publication bias.

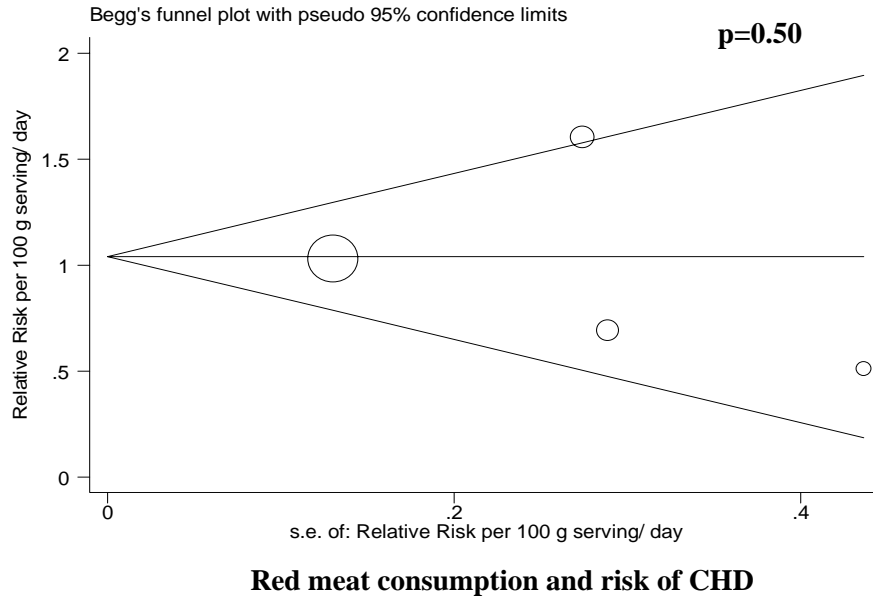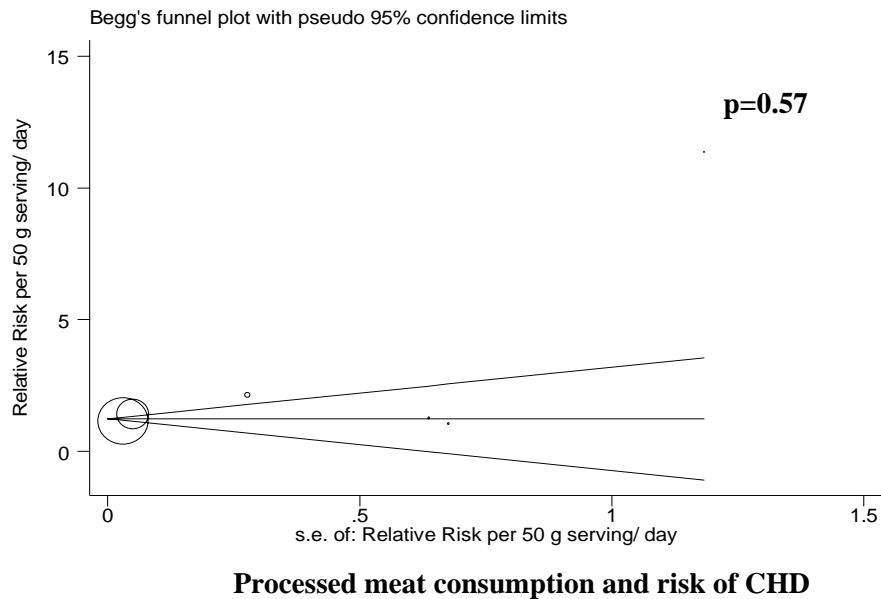

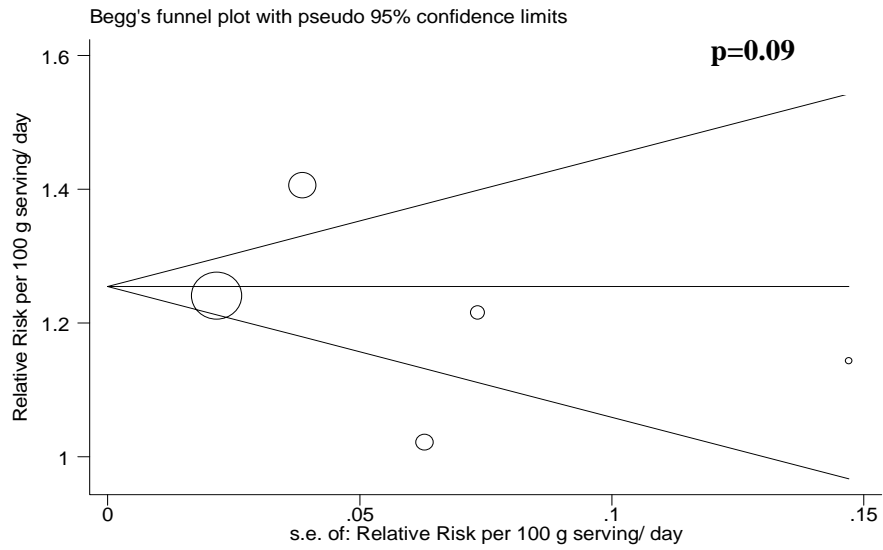

### Total meat consumption and risk of CHD

The smallest study with the extreme findings was omitted from the funnel plot, for presentation purposes. The p-value corresponds to the Begg's test when all studies are included.

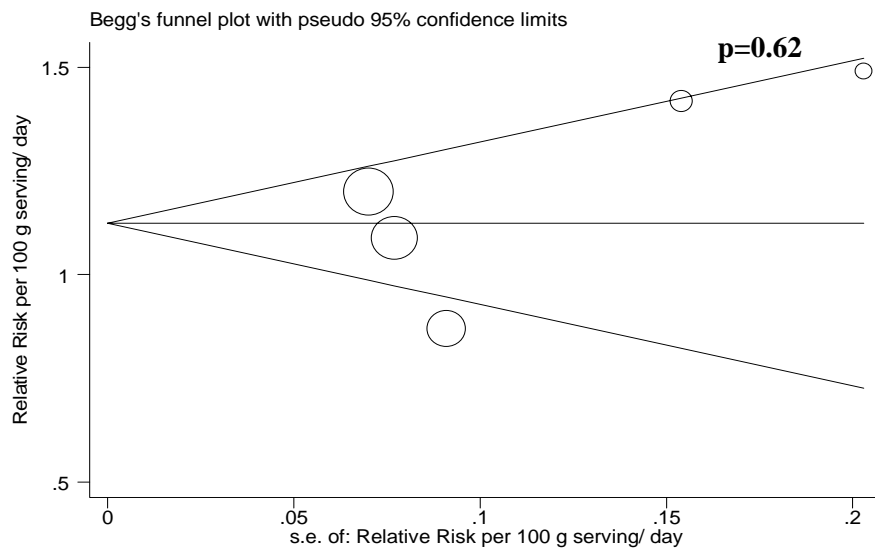

### Red meat consumption and risk of diabetes

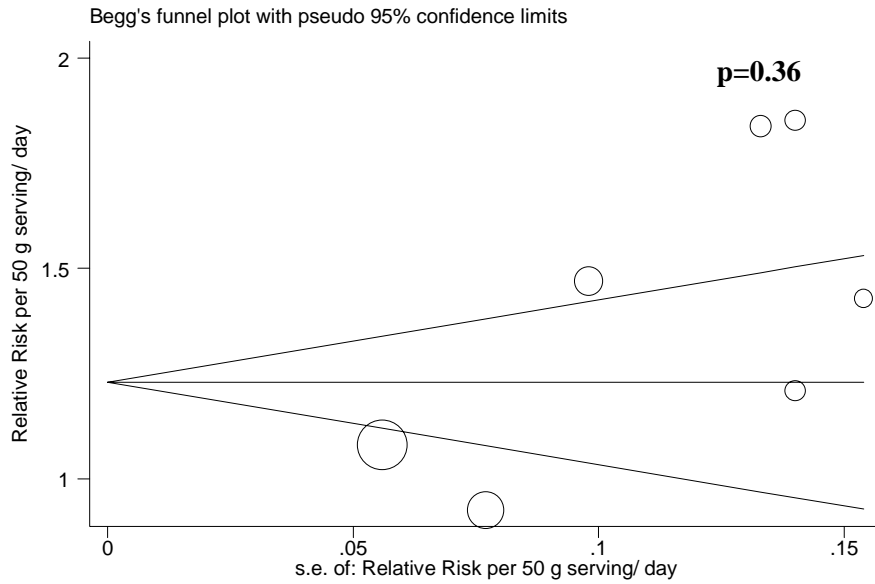

**Processed meat consumption and risk of diabetes**

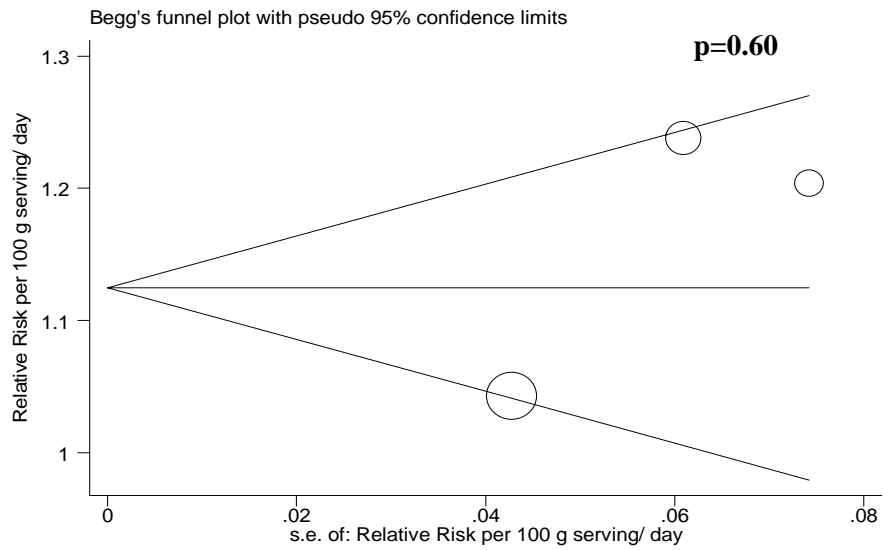

**Total meat consumption and risk of diabetes**

## Supplemental References

1. Adams SM and Standridge JB. What should we eat? Evidence from observational studies. *Southern Medical Journal*. 2006; 99:744-748.
2. Biesalski HK. Meat as a component of a healthy diet - are there any risks or benefits if meat is avoided in the diet? *Meat Science*. 2005; 70:509-524.
3. Bilenko N, Fraser D, Vardi H, Shai I and Shahar DR. Mediterranean diet and cardiovascular diseases in an Israeli population. *Prev Med*. 2005; 40:299-305.
4. Brunner EJ, Mosdol A, Witte DR, Martikainen P, Stafford M, Shipley MJ and Marmot MG. Dietary patterns and 15-y risks of major coronary events, diabetes, and mortality. *Am J Clin Nutr*. 2008; 87:1414-1421.
5. Burke V, Zhao Y, Lee AH, Hunter E, Spargo RM, Gracey M, Smith RM, Beilin LJ and Puddey IB. Predictors of type 2 diabetes and diabetes-related hospitalisation in an Australian Aboriginal cohort. *Diabetes Res Clin Pract*. 2007; 78:360-368.
6. Cai H, Shu XO, Gao YT, Li H, Yang G and Zheng W. A prospective study of dietary patterns and mortality in Chinese women. *Epidemiology*. 2007; 18:393-401.
7. Centers for Disease Control (USA). 2009 Overview of NHANES Survey Design and Weight. 2009.
8. Chang-Claude J, Hermann S, Eilber U and Steindorf K. Lifestyle determinants and mortality in German vegetarians and health-conscious persons: results of a 21-year follow-up. *Cancer Epidemiol Biomarkers Prev*. 2005; 14:963-968.
9. Damiao R, Castro TG, Cardoso MA, Gimeno SG and Ferreira SR. Dietary intakes associated with metabolic syndrome in a cohort of Japanese ancestry. *Br J Nutr*. 2006; 96:532-538.
10. Dobbins MJ, Luo W and DesMeules M. Exploring the association between nutritional factors and risk of cardiovascular disease. *Can J Cardiol*. 2007; 23:171C.
11. Drogan D, Hoffmann K, Schulz M, Bergmann MM, Boeing H and Weikert C. A food pattern predicting prospective weight change is associated with risk of fatal but not with nonfatal cardiovascular disease. *J Nutr*. 2007; 137:1961-1967.
12. Duc Son le NT, Hanh TT, Kusama K, Kunii D, Sakai T, Hung NT and Yamamoto S. Anthropometric characteristics, dietary patterns and risk of type 2 diabetes mellitus in Vietnam. *J Am Coll Nutr*. 2005; 24:229-234.
13. Fraser AG, Sabate J, Beeson WL and Strahan TM. Frequent nut eating lowered the risk for coronary heart disease among white Seventh-Day Adventists [Etiology]. *ACP Journal Club*. 1992; 117:90.
14. Fraser GE. Determinants of ischemic heart disease in Seventh-day Adventists: a review. *Am J Clin Nutr*. 1988; 48:833-836.
15. Fraser GE. Associations between diet and cancer, ischemic heart disease, and all-cause mortality in non-Hispanic white California Seventh-day Adventists. *Am J Clin Nutr*. 1999; 70:532S-538S.
16. Fraser GE, Sabate J, Beeson WL and Strahan TM. A possible protective effect of nut consumption on risk of coronary heart disease. The Adventist Health Study. *Arch Intern Med*. 1992; 152:1416-1424.
17. Fraser GE and Shavlik DJ. Risk factors for all-cause and coronary heart disease mortality in the oldest-old. The Adventist Health Study. *Arch Intern Med*. 1997; 157:2249-2258.
18. Fraser GE, Sumbureru D, Pribis P, Neil RL and Frankson MA. Association among health habits, risk factors, and all-cause mortality in a black California population. *Epidemiology*. 1997; 8:168-174.
19. Fung TT, Chiuve SE, McCullough ML, Rexrode KM, Logroscino G and Hu FB. Adherence to a DASH-style diet and risk of coronary heart disease and stroke in women. *Arch Intern Med*. 2008; 168:713-720.
20. Fung TT, Willett WC, Stampfer MJ, Manson JE and Hu FB. Dietary patterns and the risk of coronary heart disease in women. *Arch Intern Med*. 2001; 161:1857-1862.



21. Gramenzi A, Gentile A, Fasoli M, Negri E, Parazzini F and La VC. Association between certain foods and risk of acute myocardial infarction in women. *BMJ*. 1990; 300:771-773.
22. Griesenbeck JS, Steck MD, Huber JC, Jr., Sharkey JR, Rene AA and Brender JD. Development of estimates of dietary nitrates, nitrites, and nitrosamines for use with the Short Willet Food Frequency Questionnaire. *Nutr*. 2009; J 8:1-9.
23. Harper AE. Coronary heart disease--an epidemic related to diet? *Am J Clin Nutr*. 1983; 37:669-681.
24. Harriss LR, English DR, Powles J, Giles GG, Tonkin AM, Hodge AM, Brazionis L and O'Dea K. Dietary patterns and cardiovascular mortality in the Melbourne Collaborative Cohort Study. *Am J Clin Nutr*. 2007; 86:221-229.
25. Heidemann C, Hoffmann K, Spranger J, Klipstein-Grobusch K, Mhlig M, Pfeiffer AF and Boeing H. A dietary pattern protective against type 2 diabetes in the European Prospective Investigation into Cancer and Nutrition (EPIC)--Potsdam Study cohort. *Diabetologia*. 2005; 48:1126-1134.
26. Heidemann C, Schulze MB, Franco OH, van Dam RM, Mantzoros CS and Hu FB. Dietary patterns and risk of mortality from cardiovascular disease, cancer, and all causes in a prospective cohort of women. *Circulation*. 2008; 118:230-237.
27. Hodge AM, English DR, O'Dea K and Giles GG. Dietary patterns and diabetes incidence in the Melbourne Collaborative Cohort Study. *Am J Epidemiol*. 2007; 165:603-610.
28. Hodgson JM, Ward NC, Burke V, Beilin LJ and Puddey IB. Increased lean red meat intake does not elevate markers of oxidative stress and inflammation in humans. *J Nutr*. 2007; 137:363-367.
29. Hu FB, Rimm EB, Stampfer MJ, Ascherio A, Spiegelman D and Willett WC. Prospective study of major dietary patterns and risk of coronary heart disease in men. *Am J Clin Nutr*. 2000; 72:912-921.
30. Hu FB, Stampfer MJ, Manson JE, Ascherio A, Colditz GA, Speizer FE, Hennekens CH and Willett WC. Dietary saturated fats and their food sources in relation to the risk of coronary heart disease in women... Nurses' Health Study. *Am J Clin Nutr*. 1999; 70:1001-1008.
31. Hu G, Jousilahti P, Peltonen M, Bidel S and Tuomilehto J. Joint association of coffee consumption and other factors to the risk of type 2 diabetes: a prospective study in Finland. *Int J Obes (Lond)*. 2006; 30:1742-1749.
32. Jafar TH. Women in Pakistan have a greater burden of clinical cardiovascular risk factors than men. *Int J Cardiol*. 2006; 106:348-354.
33. Jiang R, Ma J, Ascherio A, Stampfer MJ, Willett WC and Hu FB. Dietary iron intake and blood donations in relation to risk of type 2 diabetes in men: a prospective cohort study. *Am J Clin Nutr*. 2004; 79:70-75.
34. Kant AK, Schatzkin A and Ziegler RG. Dietary diversity and subsequent cause-specific mortality in the NHANES I epidemiologic follow-up study. *J Am Coll Nutr*. 1995; 14:233-238.
35. Key TJ, Fraser GE, Thorogood M, Appleby PN, Beral V, Reeves G, Burr ML, Chang-Claude J, Frentzel-Beyme R, Kuzma JW, Mann J and McPherson K. Mortality in vegetarians and non-vegetarians: a collaborative analysis of 8300 deaths among 76,000 men and women in five prospective studies. *Public Health Nutr*. 1998; 1:33-41.
36. Key TJ, Fraser GE, Thorogood M, Appleby PN, Beral V, Reeves G, Burr ML, Chang-Claude J, Frentzel-Beyme R, Kuzma JW, Mann J and McPherson K. Mortality in vegetarians and nonvegetarians: detailed findings from a collaborative analysis of 5 prospective studies. *Am J Clin Nutr*. 1999; 70:516S-524S.
37. Kinjo Y, Beral V, Akiba S, Key T, Mizuno S, Appleby P, Yamaguchi N, Watanabe S and Doll R. Possible protective effect of milk, meat and fish for cerebrovascular disease mortality in Japan. *J Epidemiol*. 1999; 9:268-274.
38. Lee DH, Folsom AR and Jacobs DR, Jr. Dietary iron intake and Type 2 diabetes incidence in postmenopausal women: the Iowa Women's Health Study. *Diabetologia*. 2004; 47:185-194.
39. Li D, Siriamornpun S, Wahlqvist ML, Mann NJ and Sinclair AJ. Lean meat and heart health. *Asia Pac J Clin Nutr*. 2005; 14:113-119.

40. Malaviarachchi D, Veugelers PJ, Yip AM and MacLean DR. Dietary iron as a risk factor for myocardial infarction. Public health considerations for Nova Scotia. *Can J Public Health*. 2002; 93:267-270.
41. Mann JI, Appleby PN, Key TJ and Thorogood M. Dietary determinants of ischaemic heart disease in health conscious individuals. *Heart*. 1997; 78:450-455.
42. Martinez-Ortiz JA, Fung TT, Baylin A, Hu FB and Campos H. Dietary patterns and risk of nonfatal acute myocardial infarction in Costa Rican adults. *Eur J Clin Nutr*. 2006; 60:770-777.
43. McNaughton SA, Mishra GD and Brunner EJ. Dietary patterns, insulin resistance, and incidence of type 2 diabetes in the Whitehall II Study. *Diabetes Care*. 2008; 31:1343-1348.
44. Menotti A, Kromhout D, Blackburn H, Fidanza F, Buzina R and Nissinen A. Food intake patterns and 25-year mortality from coronary heart disease: cross-cultural correlations in the Seven Countries Study. The Seven Countries Study Research Group. *Eur J Epidemiol*. 1999; 15:507-515.
45. Mitrou PN, Kipnis V, Thiebaut AC, Reedy J, Subar AF, Wirfalt E, Flood A, Mouw T, Hollenbeck AR, Leitzmann MF and Schatzkin A. Mediterranean dietary pattern and prediction of all-cause mortality in a US population: results from the NIH-AARP Diet and Health Study. *Arch Intern Med*. 2007; 167:2461-2468.
46. Montonen J, Knekt P, Harkanen T, Jarvinen R, Heliovaara M, Aromaa A and Reunanen A. Dietary patterns and the incidence of type 2 diabetes. *Am J Epidemiol*. 2005; 161:219-227.
47. Muntoni S and Muntoni S. Epidemiological association between some dietary habits and the increasing incidence of type 1 diabetes worldwide. *Ann Nutr Metab*. 2006; 50:11-19.
48. Murakami K, Okubo H and Sasaki S. Effect of dietary factors on incidence of type 2 diabetes: A systematic review of cohort studies. *Journal of Nutritional Science and Vitaminology*. 2005; 51:292-310.
49. Osler M, Andreasen AH, Heitmann B, Hoidrup S, Gerdes U, Jorgensen LM and Schroll M. Food intake patterns and risk of coronary heart disease: a prospective cohort study examining the use of traditional scoring techniques. *Eur J Clin Nutr*. 2002; 56:568-574.
50. Osler M, Heitmann BL, Gerdes LU, Jorgensen LM and Schroll M. Dietary patterns and mortality in Danish men and women: a prospective observational study. *Br J Nutr*. 2001; 85:219-225.
51. Panagiotakos D, Bountziouka V, Zeimbekis A, Vlachou I and Polychronopoulos E. Food pattern analysis and prevalence of cardiovascular disease risk factors among elderly people from Mediterranean islands. *Journal of Medicinal Food*. 2007; 10:615-621.
52. Panagiotakos DB, Pitsavos C, Arvaniti F and Stefanadis C. Adherence to the Mediterranean food pattern predicts the prevalence of hypertension, hypercholesterolemia, diabetes and obesity, among healthy adults; the accuracy of the MedDietScore. *Preventive Medicine*. 2007; 44:335-340.
53. Pfister R, Smith K and Sorenson AW. Relating the intake of animal products with 6 chronic diseases in the aging population in Utah. *Faseb Journal*. 2004; 18: Abst.
54. Qi L, van Dam RM, Rexrode K and Hu FB. Heme iron from diet as a risk factor for coronary heart disease in women with type 2 diabetes. *Diabetes Care*. 2007; 30:101-106.
55. Qidwai W, Mangi AR and Bux R. Life style related risk factors for cardiovascular disease among patients at a teaching hospital in Karachi. *J Ayub Med Coll Abbottabad*. 2005; 17:12-14.
56. Qiu D, Mei J, Tanihata T, Kawaminami K and Minowa M. A cohort study on cerebrovascular disease in middle-aged and elderly population in rural areas in Jiangxi Province, China. *J Epidemiol*. 2003; 13:149-156.
57. Reunanen A, Takkunen H, Knekt P, Seppanen R and Aromaa A. Body iron stores, dietary iron intake and coronary heart disease mortality. *J Intern Med*. 1995; 238:223-230.
58. Sauvaget C, Nagano J, Hayashi M and Yamada M. Animal protein, animal fat, and cholesterol intakes and risk of cerebral infarction mortality in the adult health study. *Stroke*. 2004; 35:1531-1537.
59. Schulze MB, Hoffmann K, Boeing H, Linseisen J, Rohrmann S, Mhlig M, Pfeiffer AFH, Spranger J, Thamer C, Haring HU, Fritsche A and Joost HG. An accurate risk score based on anthropometric,

- dietary, and lifestyle factors to predict the development of type 2 diabetes. *Diabetes Care*. 2007; 30:510-515.
60. Schulze MB, Hoffmann K, Manson JE, Willett WC, Meigs JB, Weikert C, Heidemann C, Colditz GA and Hu FB. Dietary pattern, inflammation, and incidence of type 2 diabetes in women. *Am J Clin Nutr*. 2005; 82:675-684.
  61. Shimakawa T, Herrera-Acena MG, Colditz GA, Manson JE, Stampfer MJ, Willett WC and Stampfer MJ. Comparison of diets of diabetic and nondiabetic women. *Diabetes Care*. 1993; 16:1356-1362.
  62. Simmons RK, Harding AH, Wareham NJ and Griffin SJ. Do simple questions about diet and physical activity help to identify those at risk of Type 2 diabetes? *Diabet Med*. 2007; 24:830-835.
  63. Snowdon DA. Animal product consumption and mortality because of all causes combined, coronary heart disease, stroke, diabetes, and cancer in Seventh-day Adventists. *Am J Clin Nutr*. 1988; 48:739-748.
  64. Snowdon DA, Phillips RL and Fraser GE. Meat consumption and fatal ischemic heart disease. *Prev Med*. 1984; 13:490-500.
  65. Spencer CA, Jamrozik K and Lambert L. Do simple prudent health behaviours protect men from myocardial infarction? *Int J Epidemiol*. 1999; 28:846-852.
  66. Steffen LM, Folsom AR, Cushman M, Jacobs DR, Jr. and Rosamond WD. Greater fish, fruit, and vegetable intakes are related to lower incidence of venous thromboembolism: the Longitudinal Investigation of Thromboembolism Etiology. *Circulation*. 2007; 115:188-195.
  67. Stoeckli R and Keller U. Nutritional fats and the risk of type 2 diabetes and cancer. *Physiology & Behavior*. 2004; 83:611-615.
  68. Takeya Y, Popper JS, Shimizu Y, Kato H, Rhoads GG and Kagan A. Epidemiologic studies of coronary heart disease and stroke in Japanese men living in Japan, Hawaii and California: incidence of stroke in Japan and Hawaii. *Stroke*. 1984; 15:15-23.
  69. Tappel A. Heme of consumed red meat can act as a catalyst of oxidative damage and could initiate colon, breast and prostate cancers, heart disease and other diseases. *Medical Hypotheses*. 2007; 68:562-564.
  70. Thorogood M, Mann J, Appleby P and McPherson K. Risk of death from cancer and ischaemic heart disease in meat and non-meat eaters. *BMJ*. 1994; 308:1667-1670.
  71. Truswell AS. Cardiovascular diseases and red meat. *Nutr Diet*. 2007; 64:S162-S168.
  72. van Dam RM, Rimm EB, Willett WC, Stampfer MJ and Hu FB. Dietary patterns and risk for type 2 diabetes mellitus in U.S. men. *Ann Intern Med*. 2002; 136:201-209.
  73. Vang A, Singh PN, Lee JW, Haddad EH and Brinegar CH. Meats, processed meats, obesity, weight gain and occurrence of diabetes among adults: Findings from Adventist Health Studies. *Ann Nutr Metab*. 2008; 52:96-104.
  74. Wahrburg U, Kratz M and Cullen P. Mediterranean diet, olive oil and health. *Eur J Lipid Sci Technol*. 2002; 104:698-705.
  75. Willett W. Lessons from dietary studies in adventists and questions for the future. *Am J Clin Nutr*. 2003; 78:539S-543S.
  76. Yan S. [A socio-medical study of adult diseases related to the life style of Chinese in Japan]. *Nippon Eiseigaku Zasshi*. 1989; 44:877-886.
  77. Zyriax BC, Boeing H and Windler E. Nutrition is a powerful independent risk factor for coronary heart disease in women - The CORA Study: a population-based case-control study. *Eur J Clin Nutr*. 2005; 59:1201-1207.
